# Supplementary material for: Ligand Gaussian accelerated molecular dynamics (LiGaMD): Characterization of ligand binding thermodynamics and kinetics
Source: bioRxiv or medRxiv preprint supplement (doi:10.1101/2020.04.20.051979), 2020-04-21
Supplement: Supplementary file [file media-1.pdf]

## Supporting Information

### Ligand Gaussian accelerated molecular dynamics (LiGaMD): Characterization of ligand binding thermodynamics and kinetics

Yinglong Miao\*, Apurba Bhattarai, Jinan Wang

Center for Computational Biology and Department of Molecular Biosciences, University of

Kansas, Lawrence, KS 66047, USA

\* Corresponding email: [miao@ku.edu](mailto:miao@ku.edu)

**Table S1** Summary of host-guest binding thermodynamics and kinetics obtained from (A) experimental data and (B) cMD simulations from Ref. <sup>1</sup>. Results are obtained for the binding of aspirin and 1-butanol guests to the  $\beta$ -cyclodextrin (CD) host. In simulations, the CD host has been modeled with both the GAFF and q4MD force fields.  $\Delta G$  is the ligand binding free energy. The  $\Delta G_{comp1}$  and  $\Delta G_{comp2}$  are ligand binding free energies calculated using two different algorithms as adapted from Ref. <sup>1</sup>.  $k_{on}$  and  $k_{off}$  are the kinetic dissociation and binding rate constants, respectively, with  $N_D$  and  $N_B$  being the number of host-guest dissociation and binding events collected from individual simulations.

| Host | Ligand    | $\Delta G$<br>(kcal/mol) | $k_{on}$<br>( $\times 10^8 \text{ M}\cdot\text{s}^{-1}$ ) | $k_{off}$<br>( $\times 10^6 \text{ s}^{-1}$ ) |
|------|-----------|--------------------------|-----------------------------------------------------------|-----------------------------------------------|
| CD   | Aspirin   | $-3.74 \pm 0.00$         | $7.2 \pm 0.04$                                            | $1.3 \pm 0.03$                                |
|      | 1-Butanol | $-1.67 \pm 0.19$         | $2.8 \pm 0.8$                                             | $38 \pm 6$                                    |

(A) Experimental data

| Host        | Ligand    | cMD     | $N_D$ | $N_B$ | $\Delta G_{comp1}$<br>(kcal/mol) | $\Delta G_{comp2}$<br>(kcal/mol) | $k_{on}$<br>( $\times 10^8 \text{ M}\cdot\text{s}^{-1}$ ) | $k_{off}$<br>( $\times 10^6 \text{ s}^{-1}$ ) |
|-------------|-----------|---------|-------|-------|----------------------------------|----------------------------------|-----------------------------------------------------------|-----------------------------------------------|
| CD:<br>GAFF | Aspirin   | 9500 ns | 133   | 133   | $-3.84 \pm 0.35$                 | $-2.27 \pm 0.06$                 | $11 \pm 0.1$                                              | $24 \pm 3$                                    |
|             | 1-Butanol | 6500 ns | 42    | 42    | $1.01 \pm 0.59$                  | $-0.41 \pm 0.10$                 | $2.2 \pm 0.1$                                             | $110 \pm 20$                                  |
| CD:<br>q4MD | Aspirin   | 6000 ns | 17    | 18    | $-6.33 \pm 0.37$                 | $-4.11 \pm 0.05$                 | $32 \pm 3$                                                | $3.1 \pm 0.9$                                 |
|             | 1-Butanol | 5000 ns | 89    | 89    | $-1.33 \pm 0.34$                 | $-2.27 \pm 0.02$                 | $15 \pm 0.3$                                              | $33 \pm 0.7$                                  |

(B) cMD simulations.

**Table S2** The guest binding and unbinding time periods ( $\tau_B$  and  $\tau_U$ ) recorded from LiGaMD simulations of host-guest binding systems.

| Host        | Ligand        | GaMD<br>(300 ns x 3) | $\tau_B$ (ns)                                                                                                                                                                                                                                                  | $\tau_U$ (ns)                                                                                                                                                                                                                                                                        |
|-------------|---------------|----------------------|----------------------------------------------------------------------------------------------------------------------------------------------------------------------------------------------------------------------------------------------------------------|--------------------------------------------------------------------------------------------------------------------------------------------------------------------------------------------------------------------------------------------------------------------------------------|
| CD:<br>GAFF | Aspirin       | LiGaMD               | 32.0228, 8.5966, 3.1112,<br>39.9596, 21.2604                                                                                                                                                                                                                   | 9.9081, 194.0138, 86.3999                                                                                                                                                                                                                                                            |
|             |               | LiGaMD_Dual          | 8.2607, 0.796, 7.9322, 0.5776,<br>4.5163, 1.758, 5.9326                                                                                                                                                                                                        | 201.0795, 13.8457, 24.4303,<br>239.0854, 8.3765                                                                                                                                                                                                                                      |
| CD:<br>q4MD | Aspirin       | LiGaMD               | 31.9081, 61.633, 43.8801,<br>8.2827, 16.9167, 20.3661,<br>14.1932, 19.3123, 27.4969                                                                                                                                                                            | 1.0855, 2.1165, 86.4148,<br>35.6304, 17.3932, 115.365,<br>89.763                                                                                                                                                                                                                     |
|             |               | LiGaMD_Dual          | 3.907, 30.0912, 36.3697, 1.4833,<br>10.1038, 1.7181, 12.8671,<br>56.2154, 3.9519, 8.4395, 8.9309,<br>4.4481, 4.2826, 26.9633,<br>38.3872, 20.3627, 9.6437,<br>44.3214                                                                                          | 8.4001, 29.2999, 6.2442,<br>42.1422, 12.1334, 39.4287,<br>54.0979, 62.0065, 15.8736,<br>45.7133, 6.6287, 29.8733,<br>13.1733, 60.1833, 65.7046,<br>9.4815                                                                                                                            |
|             | 1-<br>Butanol | LiGaMD               | 5.4329, 2.5518, 11.281, 3.0967,<br>6.9, 2.606, 0.7952, 3.3571,<br>1.0371, 1.1861, 5.05, 0.9876,<br>1.275, 0.7967, 0.4231, 1.0814,<br>1.0247, 0.9549, 0.7596, 4.4845                                                                                            | 5.1734, 72.0719, 51.3295,<br>15.962, 56.6445, 0.9302,<br>16.088, 12.9821, 19.5307,<br>84.7936, 62.3141, 27.7493,<br>39.8894, 61.5153, 32.1647,<br>24.3296, 24.2369, 38.1307,<br>27.2135, 79.995                                                                                      |
|             |               | LiGaMD_Dual          | 1.4312, 2.3294, 4.6188, 1.5447,<br>1.2259, 2.1735, 1.6123, 1.8385,<br>0.8007, 5.3053, 0.6236, 0.9946,<br>0.924, 0.3333, 4.6931, 1.8042,<br>0.8413, 2.2369, 1.7726, 2.692,<br>4.133, 1.7794, 8.4176, 2.262,<br>1.5251, 6.0076, 1.262, 1.5508,<br>1.1358, 1.6418 | 1.8388, 7.8776, 20.9217,<br>79.5963, 41.6825, 50.1632,<br>22.8479, 1.5881, 11.4997,<br>18.477, 65.5491, 16.961,<br>47.0128, 8.5518, 2.548,<br>2.8552, 5.14, 16.607, 5.6482,<br>41.906, 35.6489, 4.0918,<br>18.9406, 20.069, 14.6097,<br>8.0379, 85.2561, 4.8654,<br>24.6768, 45.8237 |

**Table S3** Energy barriers of host-guest dissociation (“off”) and binding (“on”) calculated from the reweighed ( $\Delta F$ ) and modified (no reweighting,  $\Delta F^*$ ) free energy profiles, curvatures of the reweighed ( $w$ ) and modified ( $w^*$ ) free energy profiles near the guest Bound (“B”), Barrier (“Br”) and Unbound (“U”) states, and the ratio of apparent diffusion coefficients calculated from the LiGaMD and LiGaMD\_Dual simulations without reweighting (modified,  $D^*$ ) and with reweighting ( $D$ ). Results are listed for the following systems: (A) aspirin binding to CD with the GAFF force field, (B) aspirin binding to CD with the q4MD force field and (C) 1-butanol binding to CD with the q4MD force field.

| Sim         | $\Delta F$<br>(kcal/mol) |       | $\Delta F^*$<br>(kcal/mol) |       | $w$   |       |       | $w^*$ |       |       | $D^*/D$ |      |
|-------------|--------------------------|-------|----------------------------|-------|-------|-------|-------|-------|-------|-------|---------|------|
|             | Off                      | On    | Off                        | On    | B     | Br    | U     | B     | Br    | U     | Off     | On   |
| LiGaMD      | 3.09                     | 0.61  | 1.49                       | 1.87  | 0.38  | 0.08  | 0.11  | 0.32  | 0.07  | 0.15  | 1.14    | 1.53 |
|             | $\pm$                    | $\pm$ | $\pm$                      | $\pm$ | $\pm$ | $\pm$ | $\pm$ | $\pm$ | $\pm$ | $\pm$ |         |      |
|             | 0.37                     | 0.37  | 0.35                       | 0.28  | 0.21  | 0.04  | 0.01  | 0.08  | 0.08  | 0.01  |         |      |
| LiGaMD_Dual | 2.06                     | 0.40  | 0.59                       | 1.83  | 0.49  | 0.07  | 0.12  | 0.35  | 0.05  | 0.13  | 1.23    | 0.85 |
|             | $\pm$                    | $\pm$ | $\pm$                      | $\pm$ | $\pm$ | $\pm$ | $\pm$ | $\pm$ | $\pm$ | $\pm$ |         |      |
|             | 0.28                     | 0.34  | 0.37                       | 0.28  | 0.08  | 0.05  | 0.03  | 0.03  | 0.15  | 0.01  |         |      |

(A) CD (GAFF) – Aspirin

| Sim         | $\Delta F$<br>(kcal/mol) |       | $\Delta F^*$<br>(kcal/mol) |       | $w$   |       |       | $w^*$ |       |       | $D^*/D$ |      |
|-------------|--------------------------|-------|----------------------------|-------|-------|-------|-------|-------|-------|-------|---------|------|
|             | Off                      | On    | Off                        | On    | B     | Br    | U     | B     | Br    | U     | Off     | On   |
| LiGaMD      | 4.00                     | 0.97  | 2.18                       | 1.95  | 0.41  | 0.09  | 0.13  | 0.32  | 0.08  | 0.13  | 0.84    | 0.12 |
|             | $\pm$                    | $\pm$ | $\pm$                      | $\pm$ | $\pm$ | $\pm$ | $\pm$ | $\pm$ | $\pm$ | $\pm$ |         |      |
|             | 0.34                     | 0.35  | 0.28                       | 0.37  | 0.08  | 0.08  | 0.03  | 0.05  | 0.02  | 0.02  |         |      |
| LiGaMD_Dual | 4.46                     | 0.67  | 2.25                       | 1.67  | 0.46  | 0.10  | 0.18  | 0.33  | 0.08  | 0.15  | 0.92    | 1.80 |
|             | $\pm$                    | $\pm$ | $\pm$                      | $\pm$ | $\pm$ | $\pm$ | $\pm$ | $\pm$ | $\pm$ | $\pm$ |         |      |
|             | 0.22                     | 0.39  | 0.23                       | 0.24  | 0.03  | 0.12  | 0.02  | 0.02  | 0.12  | 0.00  |         |      |

(B) CD (q4MD) – Aspirin

| Sim         | $\Delta F$<br>(kcal/mol) |       | $\Delta F^*$<br>(kcal/mol) |       | $w$   |       |       | $w^*$ |       |       | $D^*/D$ |      |
|-------------|--------------------------|-------|----------------------------|-------|-------|-------|-------|-------|-------|-------|---------|------|
|             | Off                      | On    | Off                        | On    | B     | Br    | U     | B     | Br    | U     | Off     | On   |
| LiGaMD      | 2.65                     | 1.59  | 1.37                       | 2.09  | 2.23  | 0.07  | 0.12  | 2.42  | 0.06  | 0.14  | 0.94    | 1.28 |
|             | $\pm$                    | $\pm$ | $\pm$                      | $\pm$ | $\pm$ | $\pm$ | $\pm$ | $\pm$ | $\pm$ | $\pm$ |         |      |
|             | 0.34                     | 0.42  | 0.30                       | 0.19  | 0.02  | 0.05  | 0.00  | 0.02  | 0.03  | 0.01  |         |      |
| LiGaMD_Dual | 2.83                     | 1.35  | 1.82                       | 2.21  | 2.24  | 0.07  | 0.03  | 2.82  | 0.06  | 0.12  | 0.98    | 1.11 |
|             | $\pm$                    | $\pm$ | $\pm$                      | $\pm$ | $\pm$ | $\pm$ | $\pm$ | $\pm$ | $\pm$ | $\pm$ |         |      |
|             | 0.24                     | 0.25  | 0.16                       | 0.11  | 0.00  | 0.07  | 0.00  | 0.03  | 0.01  | 0.04  |         |      |

(C) CD (q4MD) – 1-Butanol

**Table S4** The ligand binding and unbinding time periods ( $\tau_B$  and  $\tau_U$ ) recorded from LiGaMD\_Dual simulations of the trypsin-benzamidine binding system.

| System           | ID   | $\tau_B$ (ns)                                                                  | $\tau_U$ (ns)                                                             |
|------------------|------|--------------------------------------------------------------------------------|---------------------------------------------------------------------------|
| Trypsin<br>- BEN | Sim1 | 14.90, 8.20, 28.90                                                             | 165.90, 77.00, 93.40                                                      |
|                  | Sim2 | 26.10, 14.00, 27.00, 18.80, 124.10                                             | 11.50, 270.70, 70.20, 415.70                                              |
|                  | Sim3 | 47.39, 31.59, 12.63, 18.29, 49.09, 19.84,<br>41.00, 15.00, 85.13, 17.19, 60.59 | 145.08, 17.21, 18.71, 28.50, 38.37, 18.52,<br>32.75, 205.65, 13.37, 32.84 |
|                  | Sim4 | 32.10, 70.00, 38.70, 30.30                                                     | 210.40, 9.40, 21.70, 496.90                                               |
|                  | Sim5 | 7.00, 46.70, 31.30, 39.60                                                      | 279.80, 179.30, 265.80                                                    |

**Table S5** Energy barriers of trypsin-benzamidine dissociation (“off”) and binding (“on”) calculated from the reweighed ( $\Delta F$ ) and modified (no reweighting,  $\Delta F^*$ ) free energy profiles, curvatures of the reweighed ( $w$ ) and modified ( $w^*$ ) free energy profiles near the guest Bound (“B”), Barrier (“Br”) and Unbound (“U”) states, and the ratio of apparent diffusion coefficients calculated from the LiGaMD\_Dual simulations without reweighting (modified,  $D^*$ ) and with reweighting ( $D$ ).

| Sim         | $\Delta F$<br>(kcal/mol) |                   | $\Delta F^*$<br>(kcal/mol) |                   | $w$               |                   |                   | $w^*$             |                   |                   | $D^*/D$ |       |
|-------------|--------------------------|-------------------|----------------------------|-------------------|-------------------|-------------------|-------------------|-------------------|-------------------|-------------------|---------|-------|
|             | Off                      | On                | Off                        | On                | B                 | Br                | U                 | B                 | Br                | U                 | Off     | On    |
| LiGaMD_Dual | 12.17<br>±<br>1.54       | 3.04<br>±<br>2.04 | 1.37<br>±<br>0.56          | 2.40<br>±<br>0.41 | 2.39<br>±<br>0.21 | 0.12<br>±<br>0.16 | 0.06<br>±<br>0.01 | 0.99<br>±<br>0.05 | 0.04<br>±<br>0.05 | 0.06<br>±<br>0.02 | 1.06    | 15.07 |

**Figure S1** Time courses of host-guest distances calculated from (A) LiGaMD and (B) LiGaMD\_Dual simulations of CD using the GAFF force field with aspirin, (C) LiGaMD and (D) LiGaMD\_Dual simulations of CD using the GAFF force field with 1-butanol, (E) LiGaMD and (F) LiGaMD\_Dual simulations of CD using the q4MD force field with aspirin, (G) LiGaMD and (H) LiGaMD\_Dual simulations of CD using the q4MD force field with 1-butanol.

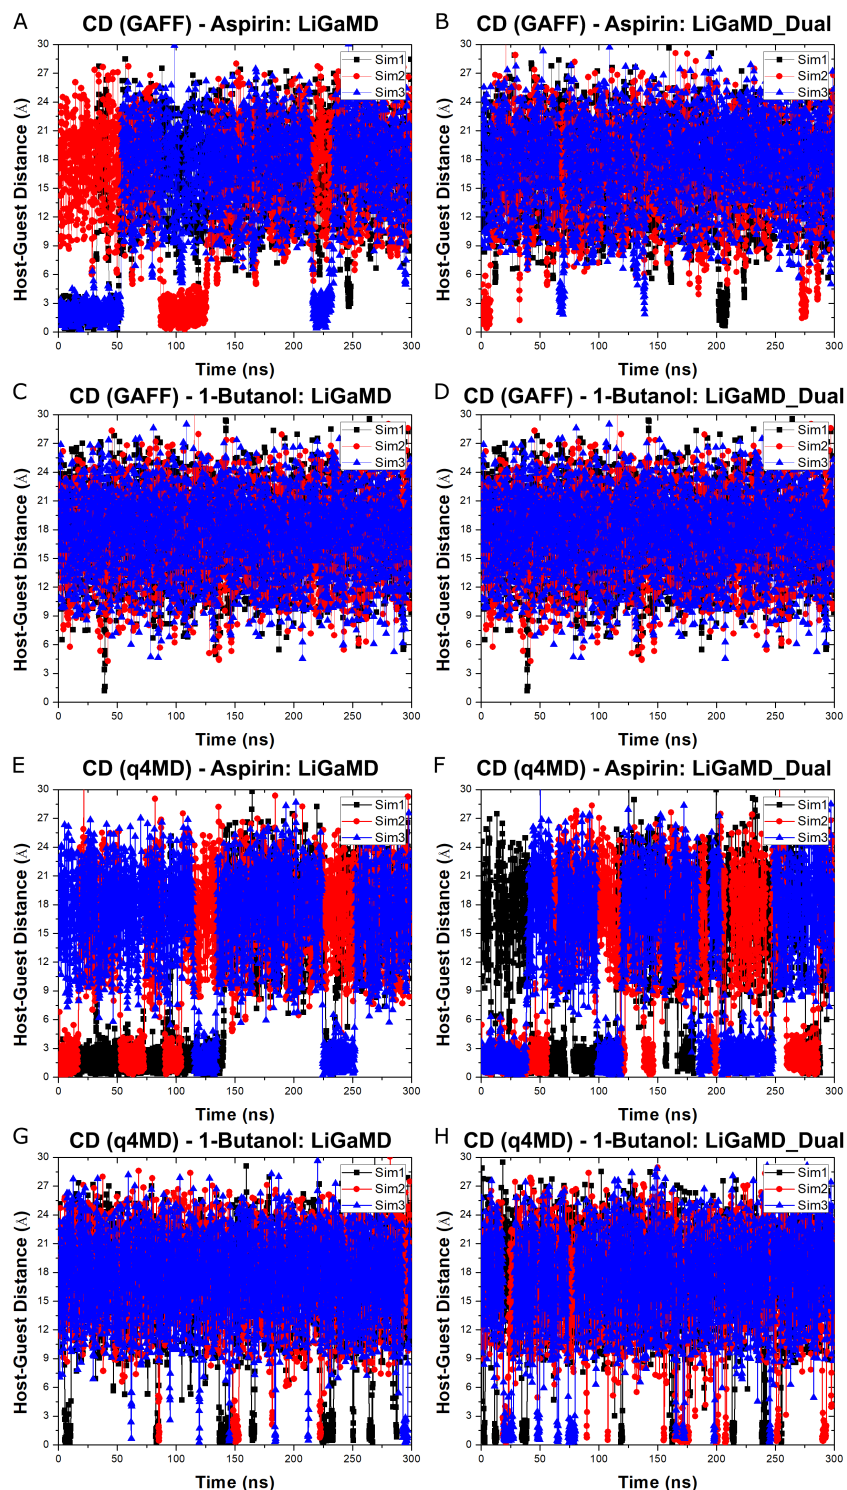

**Figure S2** Reweighted and modified PMF profiles of guest 1-butanol binding to the CD host modeled with the GAFF force field: (A) LiGaMD and (B) LiGaMD\_Dual simulations.

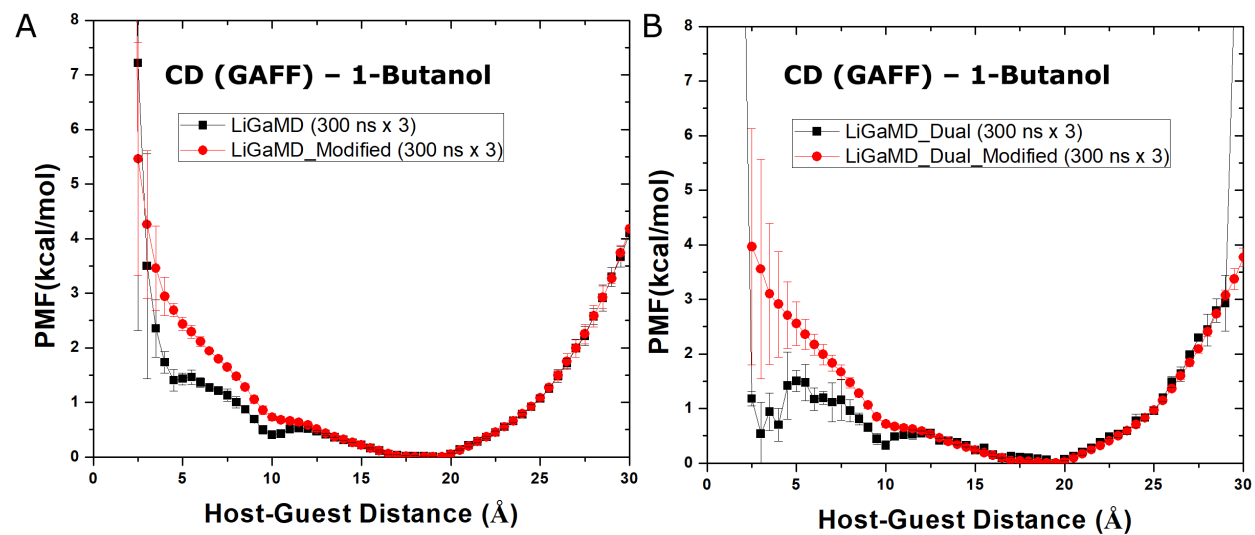

**Figure S3** Time courses of the benzamidine ligand RMSD relative to the X-ray conformation obtained from LiGaMD\_Dual equilibration simulations of trypsin, where the input parameter  $\sigma_{OP}$  was increased from 1.0 to 6.0 with the threshold energy set to upper bound for applying boost potential to the ligand non-bounded potential energy.

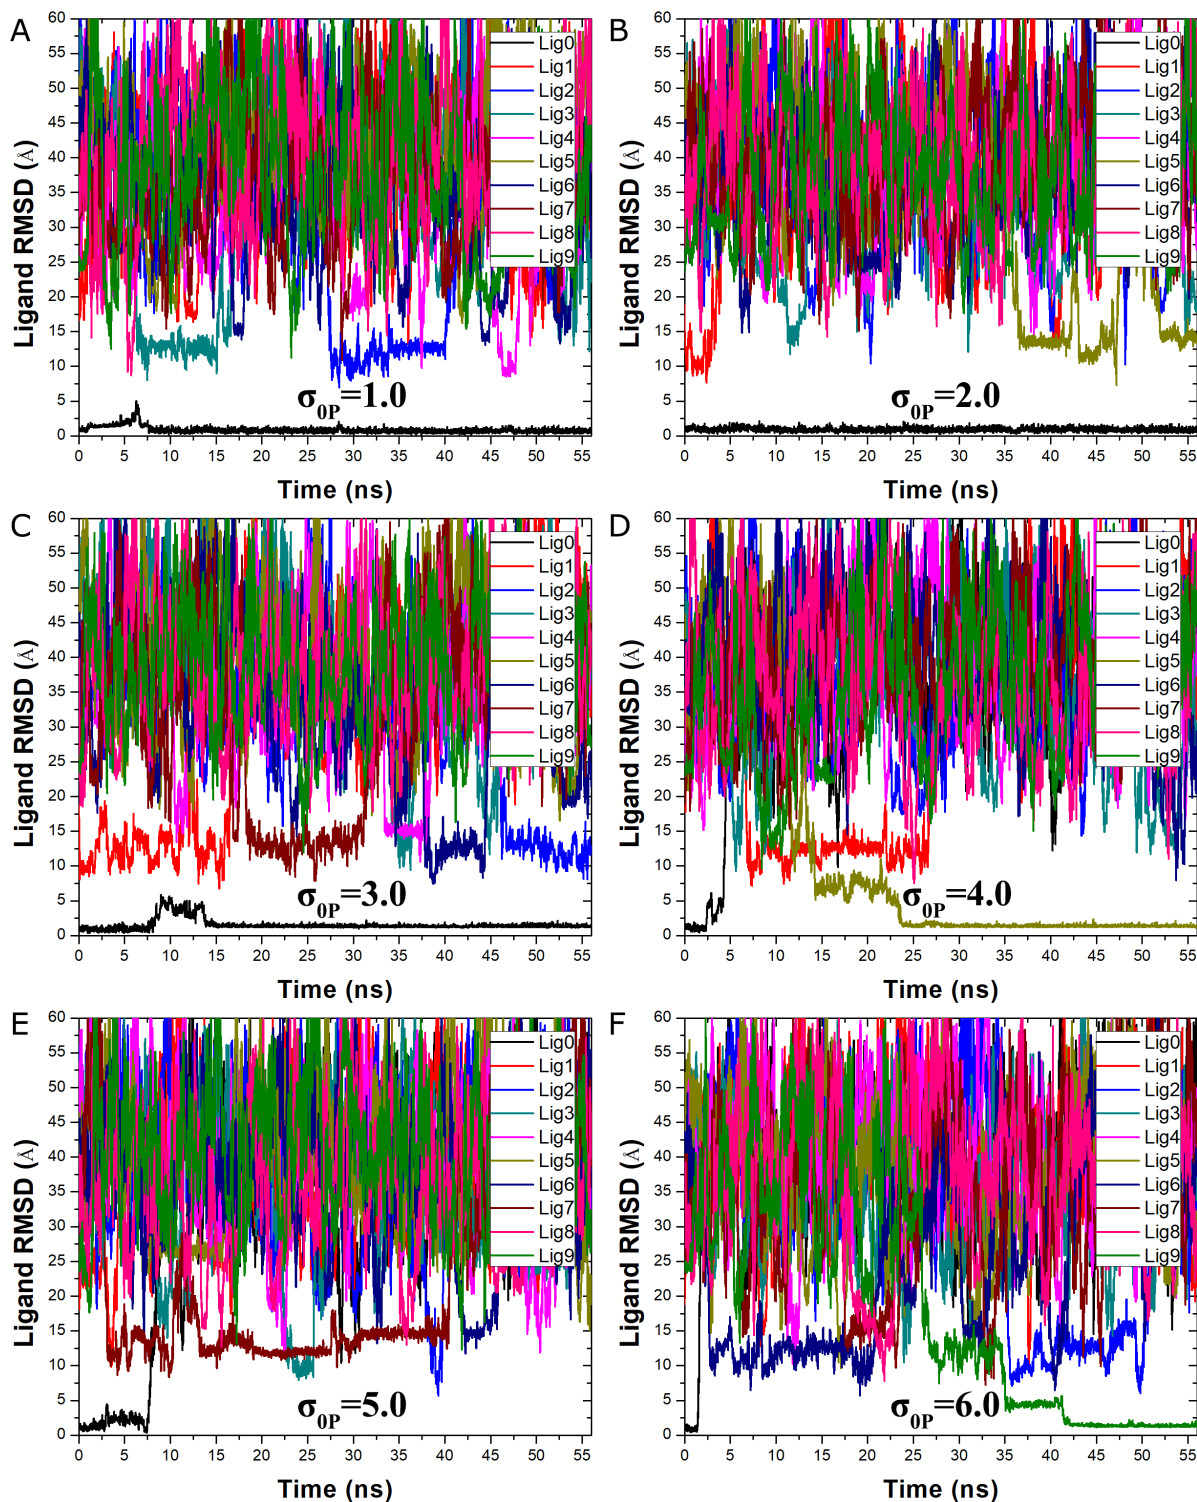



**Figure S4** RMSD of the benzamidine (BEN) ligand relative to the X-ray crystal conformation calculated from LiGaMD\_Dual simulations as listed in **Table 4**: (A) Sim1, (B) Sim2, (C) Sim3, (D) Sim4 and (E) Sim5.

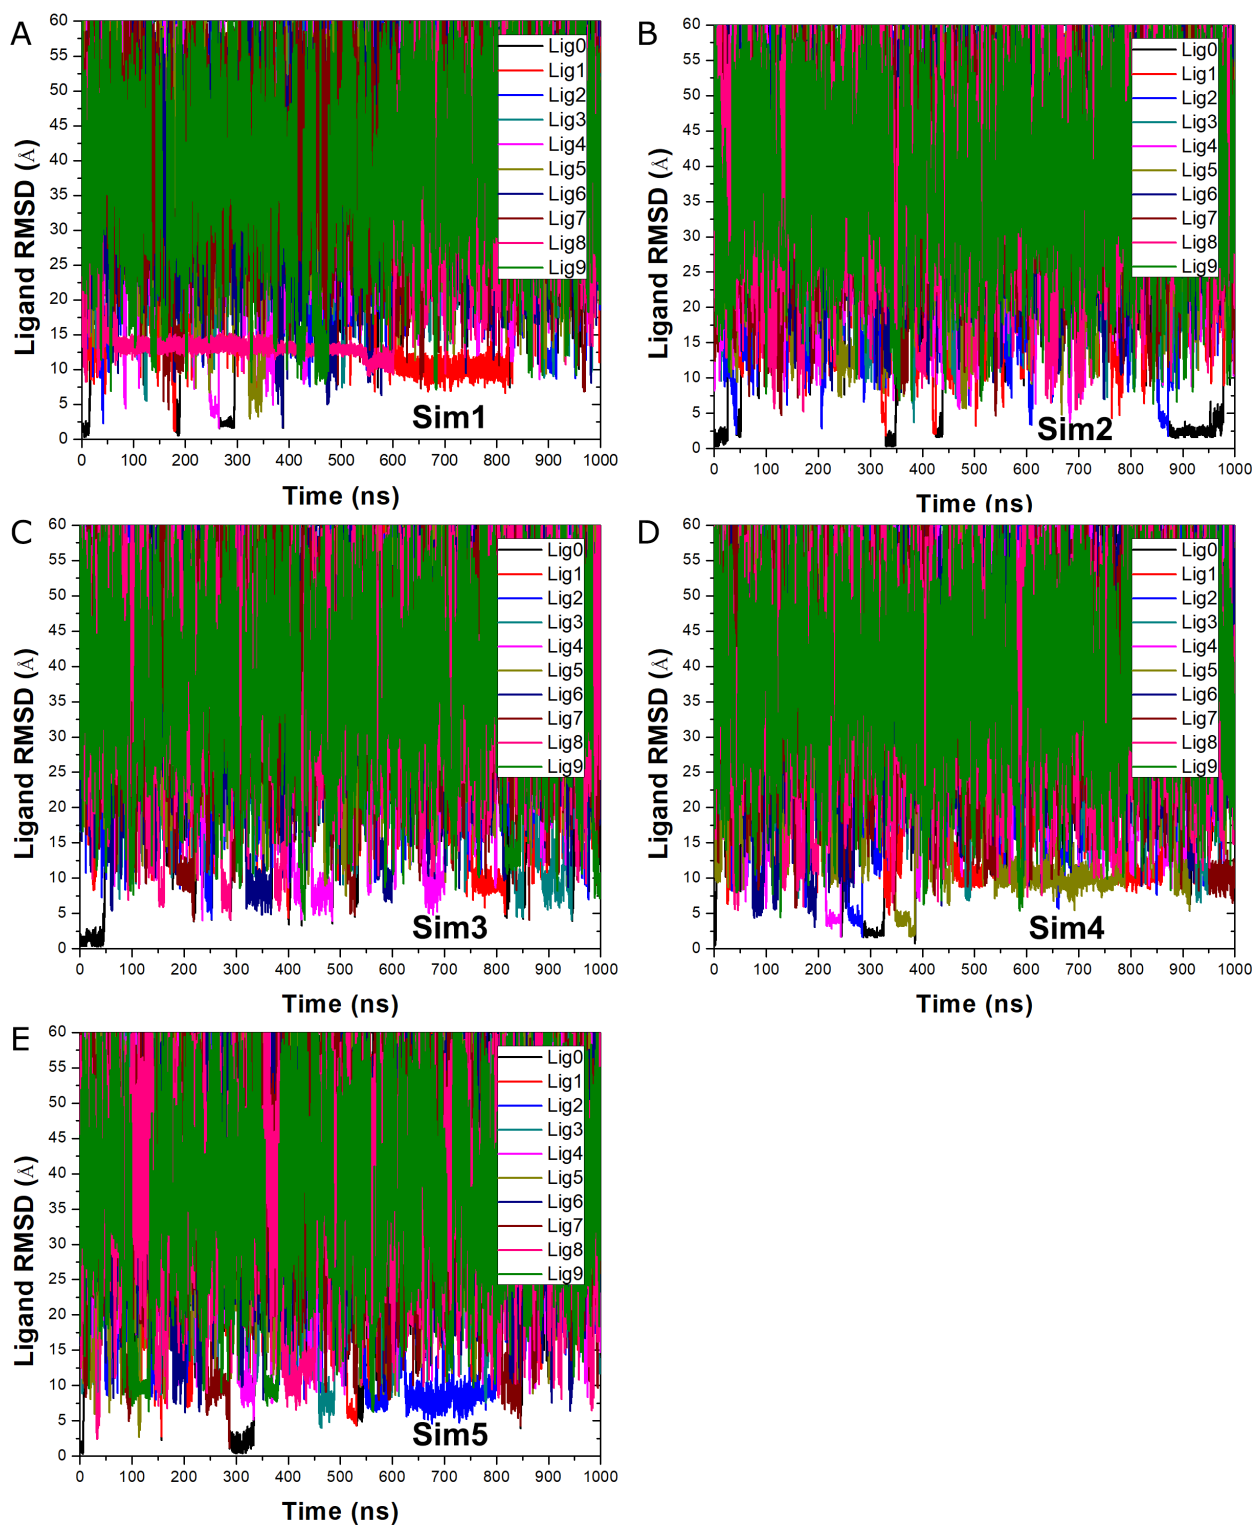

**Figure S5** Distances between the N atom in benzamidine and CG atom of Asp189 in trypsin calculated from five LiGaMD\_Dual simulations as listed in **Table 4**: (A) Sim1, (B) Sim2, (C) Sim3, (D) Sim4 and (E) Sim5. Distance plots of Sim2 are provided in **Figure 5A**.

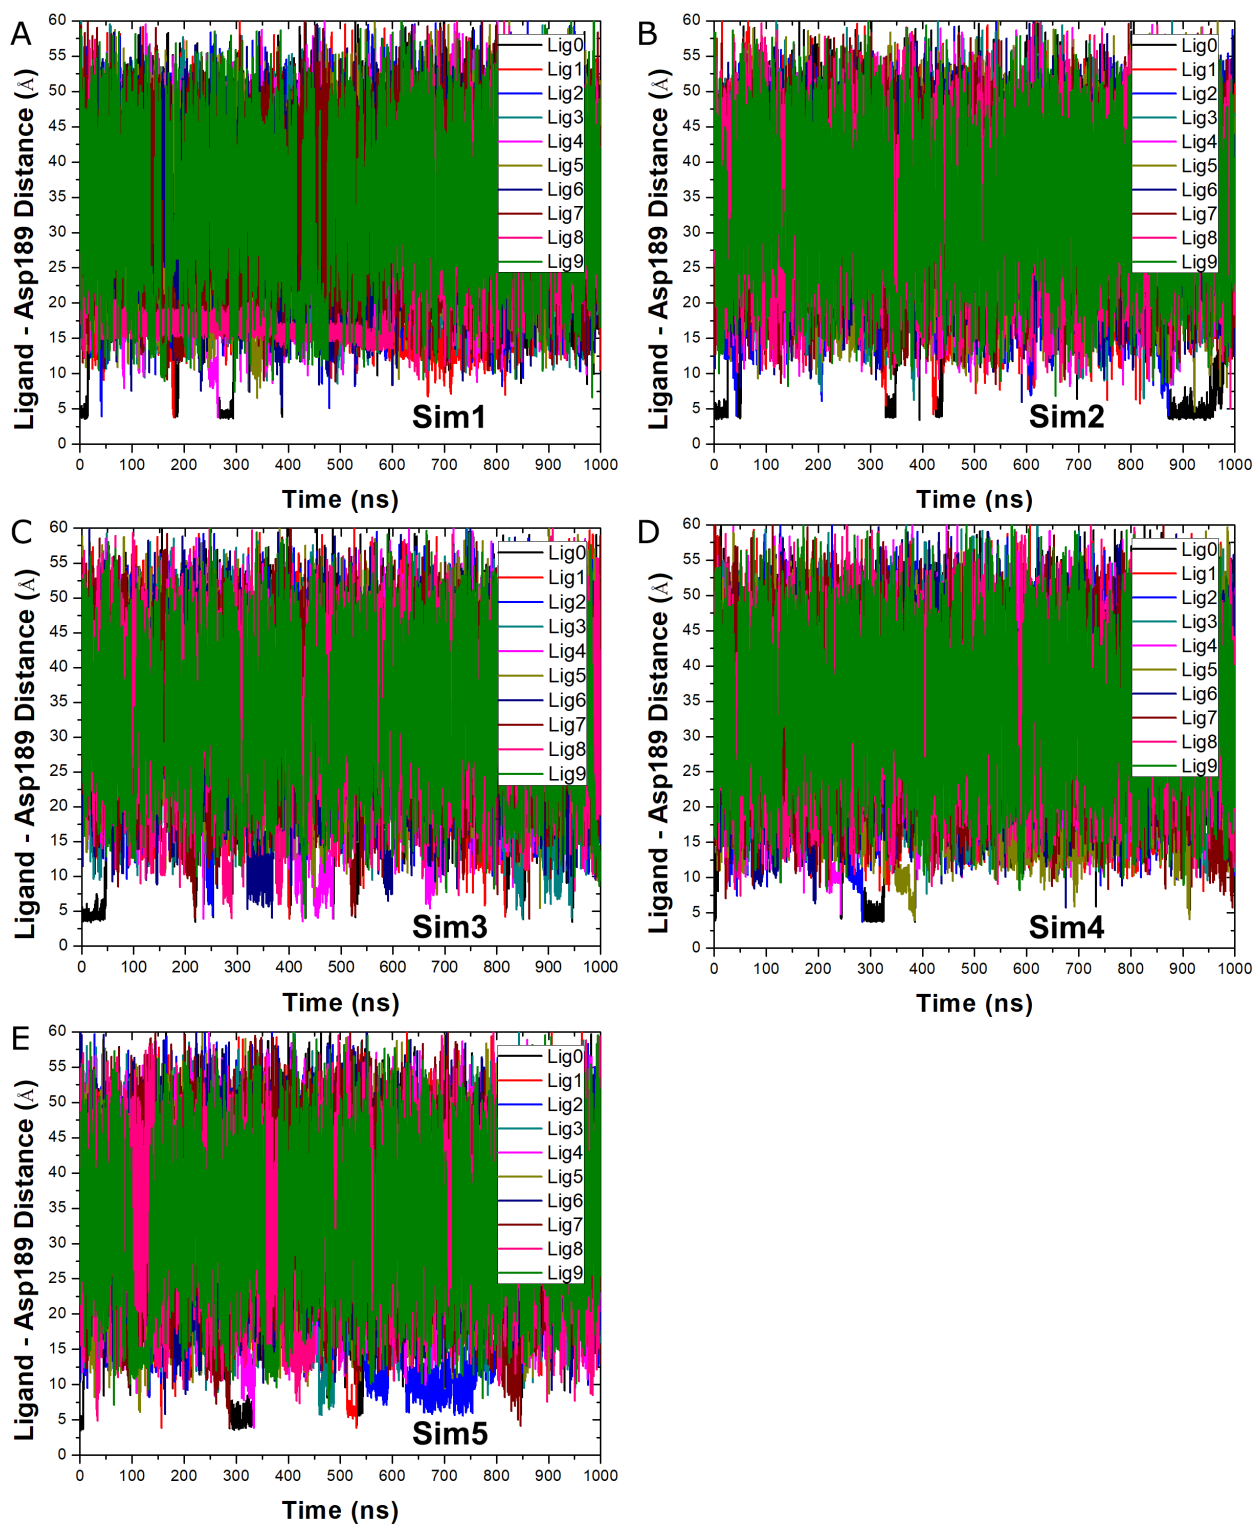

**Figure S6** Reweighted 2D PMF profiles of the BEN:N – Asp189:CG and Trp215:NE – Asp189:CG atom distances calculated from five individual 1000 ns LiGaMD\_Dual simulations of the benzamidine inhibitor binding to trypsin: (A) Sim1, (B) Sim2, (C) Sim3, (D) Sim4 and (E) Sim5.

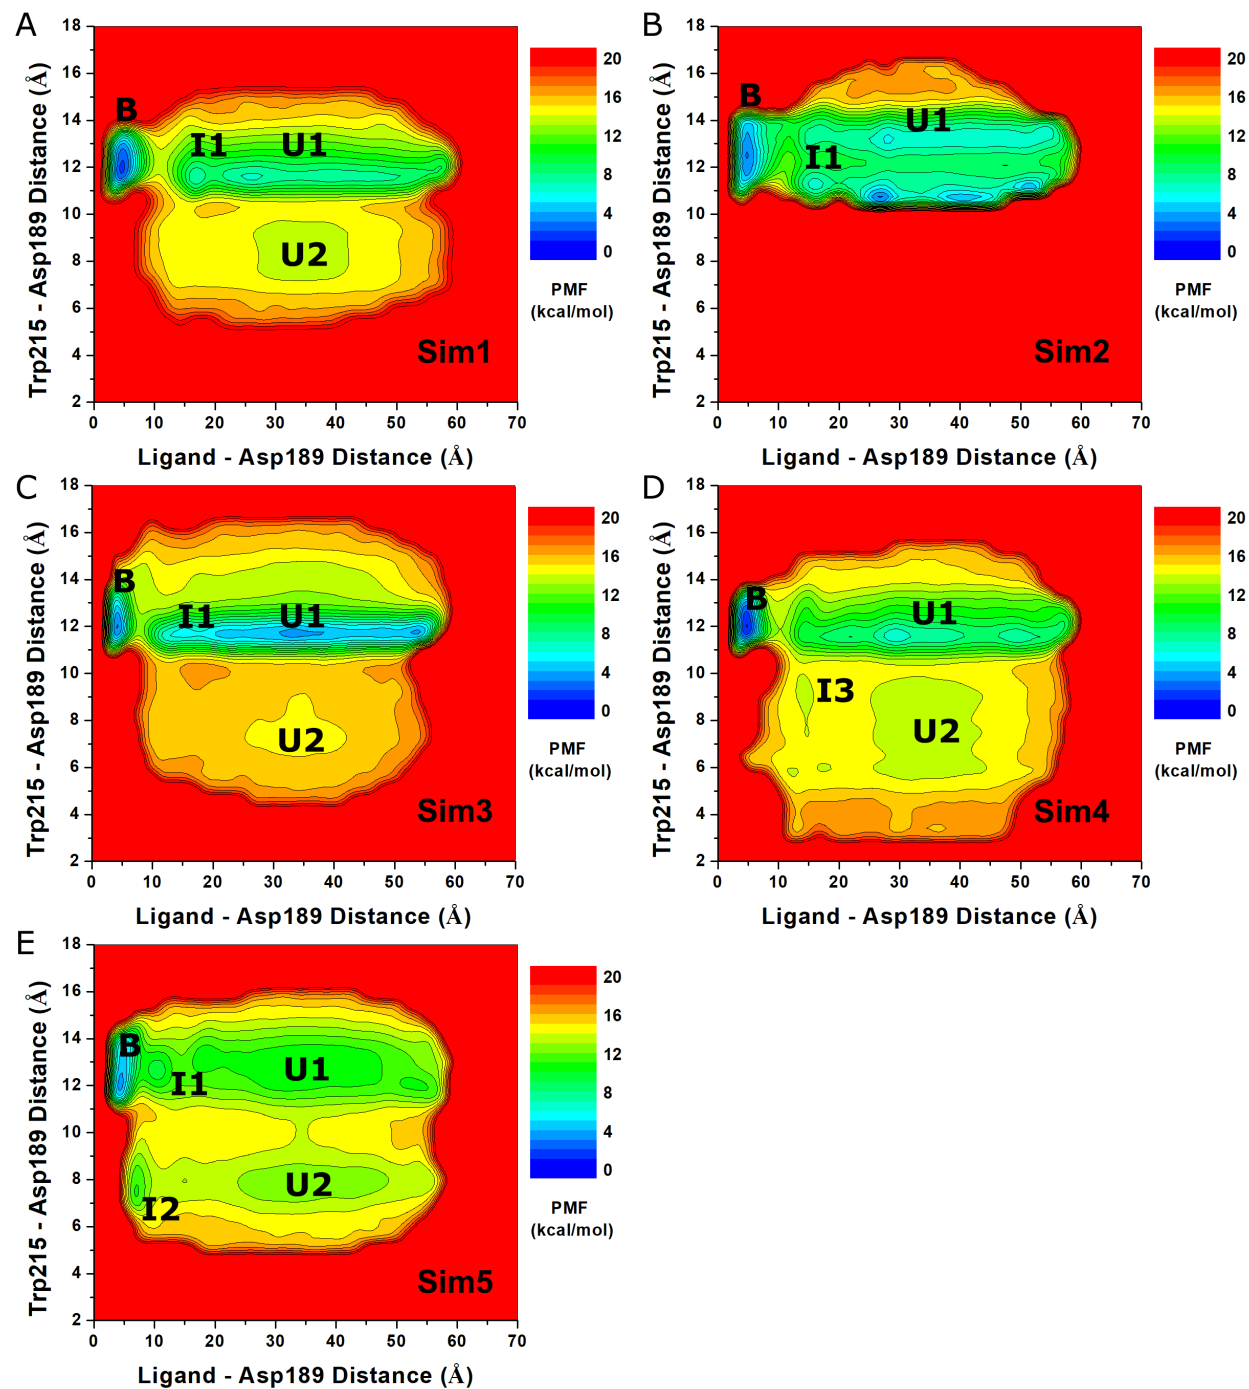

**Figure S7** Modified 2D PMF profiles of the BEN:N – Asp189:CG and Trp215:NE – Asp189:CG atom distances calculated from five individual 1000 ns LiGaMD\_Dual simulations of the benzamidine inhibitor binding to trypsin: (A) Sim1, (B) Sim2, (C) Sim3, (D) Sim4 and (E) Sim5.

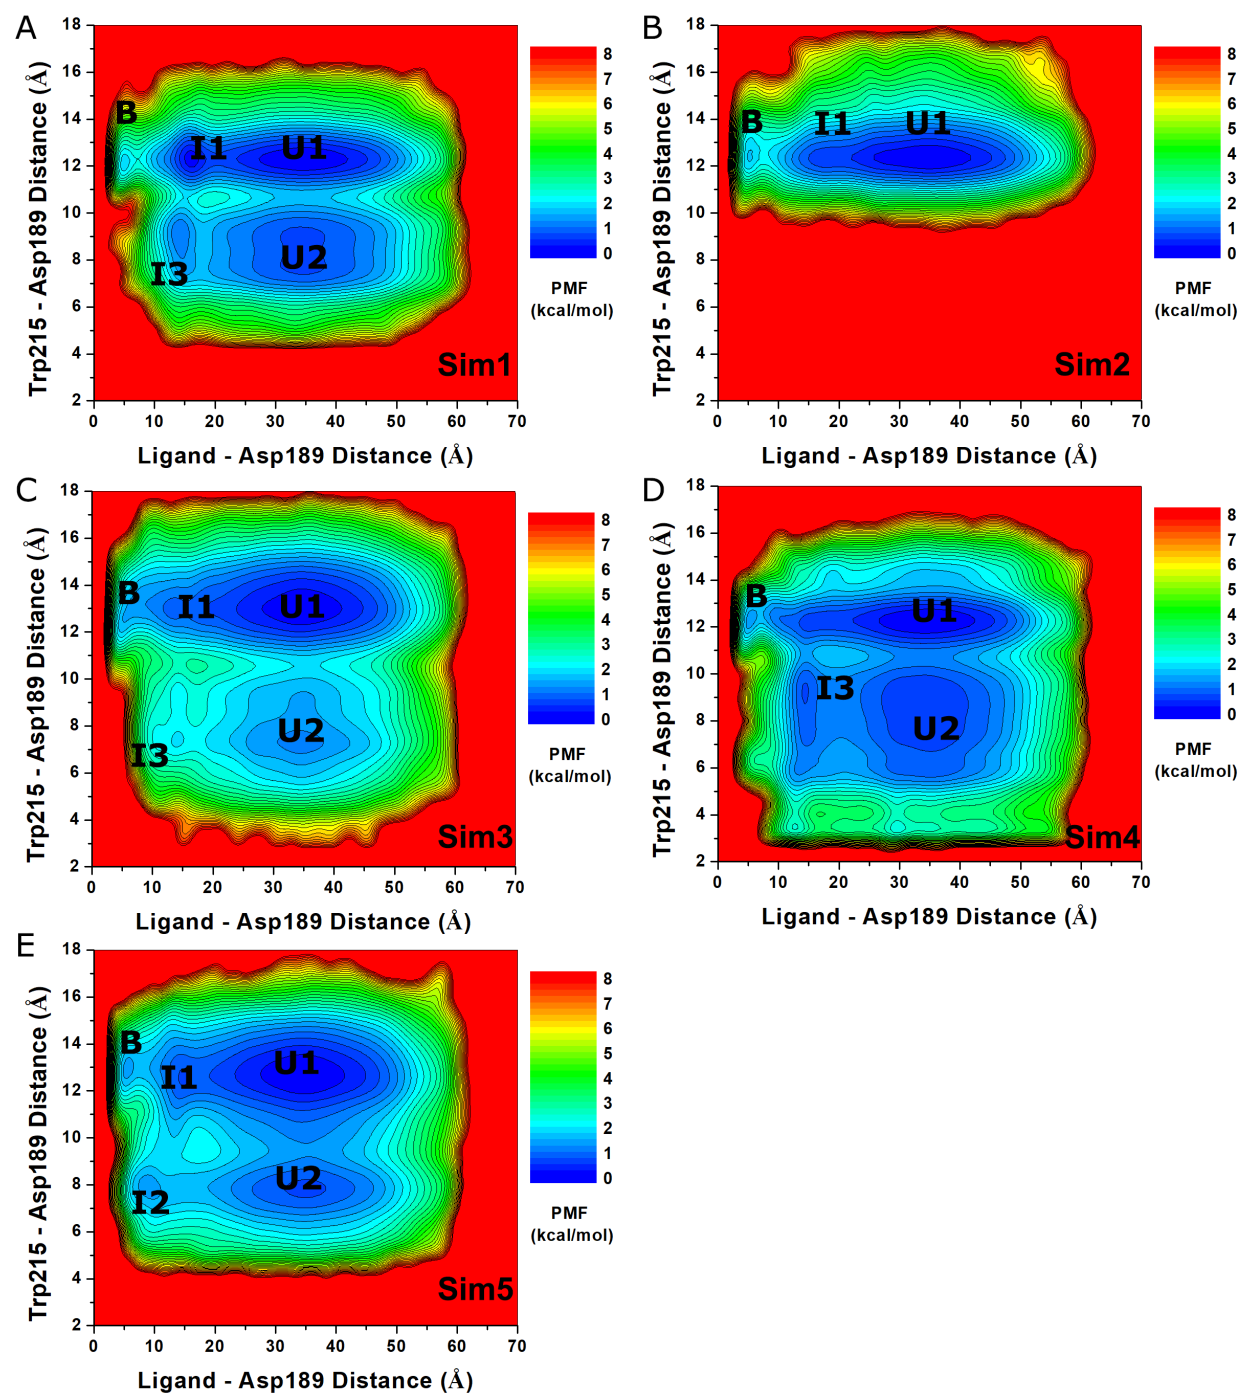

## References:

1. Tang, Z. Y.; Chang, C. E. A., Binding Thermodynamics and Kinetics Calculations Using Chemical Host and Guest: A Comprehensive Picture of Molecular Recognition. *J Chem Theory Comput* **2018**, *14* (1), 303-318.
